# Supplementary material
Source: MDPI journal article supplement (https://www.mdpi.com/2306-5729/4/2/72)
Supplement: s1 [file s1]

Supplementary material

Climate data for undertaking hygrothermal and whole building simulations under projected climate change influences in 11 Canadian cities

Abhishek Gaur 1*, Michael Lacasse 1 and Marianne Armstrong 1

1 Construction Research Center, National Research Council Canada, 1200 Montreal Road, K1A 0R6, Ottawa Canada

***** Correspondence: Abhishek.Gaur@nrc-cnrc.gc.ca; Tel.: +1-613-998-9799

Received: date; Accepted: date; Published: date

**Table S1**. Climate gauging stations considered to prepare merged observational climate data for Calgary.

| **Climate variable (Program source-element)** | **Station name** | **Climate ID** | **Longitude (ºE)** | **Latitude (ºN)** | **Time-period of data collection** |
| --- | --- | --- | --- | --- | --- |
| Global solar radiation  (HLY11-061) | Lethbridge Cda* | 3033890 | -112.8 | 49.7 | 1989-1999 |
| Cloud-cover  (HLY01-082) | Cop Upper | 3031875 | -114.2 | 51.1 | 2010-2015 |
| Calgary Int'l A | 3031093 | -114.0 | 51.1 | 1986-2016 |
| Calgary Int'l Cs | 3031094 | -114.0 | 51.1 | 2008-2015 |
| Rainfall (HLY03-123) | Calgary Int'l A | 3031093 | -114.0 | 51.1 | 1986-2010 |
| Calgary Int'l Cs | 3031094 | -114.0 | 51.1 | 2009-2016 |
| Wind speed (HLY01-075) and wind direction (HLY01-156) | Calgary Int'l A | 3031093 | -114.0 | 51.1 | 1986-2016 |
| Calgary Int'l Cs | 3031094 | -114.0 | 51.1 | 2012-2016 |
| Relative humidity (HLY01-080) | Calgary Int'l A | 3031093 | -114.0 | 51.1 | 1986-2016 |
| Calgary Int'l Cs | 3031094 | -114.0 | 51.1 | 2008-2016 |
| Temperature (HLY01-078) | Calgary Int'l A | 3031093 | -114.0 | 51.1 | 1986-2016 |
| Calgary Int'l Cs | 3031094 | -114.0 | 51.1 | 2008-2016 |
| Pressure (HLY01-077) | Calgary Int'l A | 3031093 | -114.0 | 51.1 | 1986-2016 |
| Calgary Int'l Cs | 3031094 | -114.0 | 51.1 | 2008-2016 |
| Snow-depth (DLY04-013) | Cop Upper | 3031875 | -114.2 | 51.1 | 2010-2015 |
| Calgary Int'l A | 3031093 | -114.0 | 51.1 | 1992-2016 |
| Calgary Int'l Cs | 3031094 | -114.0 | 51.1 | 2008-2016 |

**Table S2**. Climate gauging stations considered to prepare merged observational climate data for Charlottetown.

| **Climate variable** | **Station name** | **Climate ID** | **Longitude (ºE)** | **Latitude (ºN)** | **Time-period of data collection** |
| --- | --- | --- | --- | --- | --- |
| Global solar radiation (HLY11-061) | Charlottetown Cda | 8300400 | -63.1 | 46.3 | 1986-1997 |
| Cloud-cover (HLY01-082) | Charlottetown A | 8300300 | -63.1 | 46.3 | 1986-2016 |
| Rainfall (HLY03-123) | Charlottetown Cda | 8300400 | -63.1 | 46.3 | 1986-1990 |
| Charlottetown A | 8300300 | -63.1 | 46.3 | 2007-2016 |
| Wind speed (HLY01-075) and wind direction (HLY01-156) | Charlottetown A | 8300300 | -63.1 | 46.3 | 1986-2016 |
| Relative humidity (HLY01-080) | Charlottetown A | 8300300 | -63.1 | 46.3 | 1986-2016 |
| Temperature (HLY01-078) | Charlottetown A | 8300300 | -63.1 | 46.3 | 1986-2016 |
| Pressure (HLY01-077) | Charlottetown A | 8300300 | -63.1 | 46.3 | 1986-2016 |
| Snow-depth (DLY04-013) | Charlottetown A | 8300300 | -63.1 | 46.3 | 1992-2016 |

**Table S3**. Climate gauging stations considered to prepare merged observational climate data for Halifax.

| **Climate variable** | **Station name** | **Climate ID** | **Longitude (ºE)** | **Latitude (ºN)** | **Time-period of data collection** |
| --- | --- | --- | --- | --- | --- |
| Global solar radiation (HLY11-061) | Halifax Citadel | 8202220 | -63.6 | 44.7 | 1986-2002 |
| Cloud-cover (HLY01-082) | Shearwater A | 8205090 | -63.5 | 44.6 | 1986-2016 |
| Bedford Mwo | 8200576 | -63.7 | 44.7 | 1995-1996 |
| Halifax Int’l A | 8202251 | -63.5 | 44.9 | 1986-2016 |
| Rainfall (HLY03-123) | Shearwater Auto | 8205091 | -63.5 | 44.6 | 2007-2010 |
| Shearwater Rcs | 8205092 | -63.5 | 44.6 | 2008-2016 |
| Shearwater A | 8205090 | -63.5 | 44.6 | 1986-2007 |
| Halifax Int’l A | 8202251 | -63.5 | 44.9 | 1986-2016 |
| Wind speed (HLY01-075) and wind direction (HLY01-156) | Halifax Kootenay | 8202252 | -63.6 | 44.6 | 2004-2016 |
| Mcnabs Island (Aut) | 8203478 | -63.5 | 44.6 | 1986-2016 |
| Osborne Head Dnd | 8204190 | -63.4 | 44.6 | 2004-2016 |
| Shearwater Auto | 8205091 | -63.4 | 44.6 | 1996-2004 |
| Shearwater Jetty | 8205093 | -63.5 | 44.6 | 1993-2016 |
| Shearwater Rcs | 8205092 | -63.5 | 44.6 | 1993-2016 |
| Shearwater A | 8205090 | -63.5 | 44.6 | 1986-2016 |
| Halifax Commons | 8202221 | -63.6 | 44.6 | 2010-2011 |
| Halifax Windsor Park | 8202255 | -63.6 | 44.7 | 2004-2016 |
| Halifax Dockyard | 8202240 | -63.6 | 44.7 | 2004-2016 |
| Bedford Basin | 8200573 | -63.6 | 44.7 | 2004-2016 |
| Bedford Mwo | 8200576 | -63.7 | 44.7 | 1995-1998 |
| Bedford Range | 8200574 | -63.7 | 44.8 | 2004-2016 |
| Halifax Int’l A | 8202251 | -63.7 | 44.8 | 1986-2016 |
| Relative humidity (HLY01-080) | Halifax Kootenay | 8202252 | -63.6 | 44.6 | 2004-2016 |
| Mcnabs Island (Aut) | 8203478 | -63.5 | 44.6 | 1999-2016 |
| Osborne Head Dnd | 8204190 | -63.4 | 44.6 | 2004-2016 |
| Shearwater Auto | 8205091 | -63.4 | 44.6 | 1996-2010 |
| Shearwater Jetty | 8205093 | -63.5 | 44.6 | 1994-2016 |
| Shearwater Rcs | 8205092 | -63.5 | 44.6 | 2008-2016 |
| Shearwater A | 8205090 | -63.5 | 44.6 | 1986-2016 |
| Halifax Commons | 8202221 | -63.6 | 44.6 | 2010-2011 |
| Halifax Windsor Park | 8202255 | -63.6 | 44.7 | 2004-2016 |
| Halifax Dockyard | 8202240 | -63.6 | 44.7 | 2004-2016 |
| Bedford Basin | 8200573 | -63.6 | 44.7 | 2004-2016 |
| Bedford Mwo | 8200576 | -63.7 | 44.7 | 1995-1998 |
| Bedford Range | 8200574 | -63.7 | 44.8 | 2004-2016 |
| Halifax Int’l A | 8202251 | -63.7 | 44.8 | 1986-2016 |
| Temperature (HLY01-078) | Halifax Kootenay | 8202252 | -63.6 | 44.6 | 2004-2016 |
| Mcnabs Island (Aut) | 8203478 | -63.5 | 44.6 | 1986-2016 |
| Osborne Head Dnd | 8204190 | -63.4 | 44.6 | 2004-2016 |
| Shearwater Auto | 8205091 | -63.4 | 44.6 | 1996-2010 |
| Shearwater Jetty | 8205093 | -63.5 | 44.6 | 1993-2016 |
| Shearwater Rcs | 8205092 | -63.5 | 44.6 | 2008-2016 |
| Shearwater A | 8205090 | -63.5 | 44.6 | 1986-2016 |
| Halifax Commons | 8202221 | -63.6 | 44.6 | 2010-2011 |
| Halifax Windsor Park | 8202255 | -63.6 | 44.7 | 2004-2016 |
| Halifax Dockyard | 8202240 | -63.6 | 44.7 | 2004-2016 |
| Bedford Basin | 8200573 | -63.6 | 44.7 | 2004-2016 |
| Bedford Mwo | 8200576 | -63.7 | 44.7 | 1995-1998 |
| Bedford Range | 8200574 | -63.7 | 44.8 | 2004-2016 |
| Halifax Int’l A | 8202251 | -63.7 | 44.8 | 1986-2016 |
| Pressure (HLY01-077) | Halifax Kootenay | 8202252 | -63.6 | 44.6 | 2004-2016 |
| Mcnabs Island (Aut) | 8203478 | -63.5 | 44.6 | 2000-2016 |
| Osborne Head Dnd | 8204190 | -63.4 | 44.6 | 2004-2016 |
| Shearwater Auto | 8205091 | -63.4 | 44.6 | 1999-2010 |
| Shearwater Jetty | 8205093 | -63.5 | 44.6 | 2001-2016 |
| Shearwater Rcs | 8205092 | -63.5 | 44.6 | 2008-2016 |
| Shearwater A | 8205090 | -63.5 | 44.6 | 1986-2016 |
| Halifax Windsor Park | 8202255 | -63.6 | 44.7 | 2015-2016 |
| Halifax Dockyard | 8202240 | -63.6 | 44.7 | 2015-2016 |
| Bedford Basin | 8200573 | -63.6 | 44.7 | 2004-2016 |
| Bedford Range | 8200574 | -63.7 | 44.8 | 2004-2016 |
| Halifax Int’l A | 8202251 | -63.7 | 44.8 | 1986-2016 |
| Snow-depth (DLY04-013) | Shearwater Auto | 8205091 | -63.5 | 44.6 | 1997-2010 |
| Shearwater Rcs | 8205092 | -63.5 | 44.6 | 2009-2016 |
| Shearwater A | 8205090 | -63.5 | 44.6 | 2009-2016 |
| Halifax Windsor Park | 8202255 | -63.6 | 44.7 | 1992-2007 |
| Halifax Int’l A | 8202251 | -63.7 | 44.8 | 1999-2016 |

**Table S4**. Climate gauging stations considered to prepare merged observational climate data for Moncton.

| **Climate variable** | **Station name** | **Climate ID** | **Longitude (ºE)** | **Latitude (ºN)** | **Time-period of data collection** |
| --- | --- | --- | --- | --- | --- |
| Global solar radiation (HLY11-061) | Fredericton Cda* | 8101600 | -66.6 | 45.9 | 1986-2005 |
| Cloud-cover  (HLY01-082) | Moncton A | 8103200 | -64.7 | 46.1 | 1986-2012 |
| Moncton Int’l A | 8103201 | -64.7 | 46.1 | 2012-2016 |
| Rainfall (HLY03-123) | Moncton | 8103100 | -64.8 | 46.1 | 1996-1999 |
| Moncton A | 8103200 | -64.7 | 46.1 | 1986-2012 |
| Moncton Int’l A | 8103201 | -64.7 | 46.1 | 2012-2016 |
| Wind speed (HLY01-075) and wind direction (HLY01-156) | Moncton A | 8103200 | -64.7 | 46.1 | 1986-2012; 2016 |
| Moncton Int’l A | 8103201 | -64.7 | 46.1 | 2012-2016 |
| Relative humidity (HLY01-080) | Moncton A | 8103200 | -64.7 | 46.1 | 1986-2012; 2016 |
| Moncton Int’l A | 8103201 | -64.7 | 46.1 | 2012-2016 |
| Temperature (HLY01-078) | Moncton A | 8103200 | -64.7 | 46.1 | 1986-2012; 2016 |
| Moncton Int’l A | 8103201 | -64.7 | 46.1 | 2012-2016 |
| Pressure (HLY01-077) | Moncton A | 8103200 | -64.7 | 46.1 | 1986-2012; 2016 |
| Moncton Int’l A | 8103201 | -64.7 | 46.1 | 2012-2016 |
| Snow-depth (DLY04-013) | Moncton A | 8103200 | -64.7 | 46.1 | 1992-2016 |

**Table S5**. Climate gauging stations considered to prepare merged observational climate data for Montreal.

| **Climate variable** | **Station name** | **Climate ID** | **Longitude (ºE)** | **Latitude (ºN)** | **Time-period of data collection** |
| --- | --- | --- | --- | --- | --- |
| Global solar radiation (HLY11-061) | Montreal/Pierre Elliott Trudeau Int’l A | 7025250 | -73.8 | 45.5 | 1988-1998 |
| Cloud-cover (HLY01-082) | Montreal/Pierre Elliott Trudeau Int’l A | 7025250 | -73.8 | 45.5 | 1986-2016 |
| Montreal/St-Hubert A | 7027320 | -73.5 | 45.5 | 1986-2015 |
| Rainfall (HLY03-123) | Ste Anne De Bellevue | 7026839 | -73.9 | 45.4 | 1986-1992 |
| Montreal/Pierre Elliott Trudeau Int’l A | 7025250 | -73.8 | 45.5 | 1986-1994; 2005-2014 |
| Ste Dorothee | 7027110 | -73.8 | 45.5 | 1986-1997 |
| Montreal Jar Bot | 7025257 | -73.6 | 45.6 | 1986-2016 |
| Montreal Mcgill | 7025280 | -73.6 | 45.5 | 1986-1992 |
| Montreal Lafontaine | 7025267 | -73.6 | 45.5 | 1986-1992 |
| Montreal Jar Bot | 7025257 | -73.6 | 45.6 | 1986-1989 |
| Montreal/St-Hubert A | 7027320 | -73.4 | 45.5 | 1986-1999 |
| Wind speed (HLY01-075) and wind direction (HLY01-156) | Ste-Anne-De-Bellevue 1 | 702FHL8 | -73.9 | 45.4 | 1993-2016 |
| Ile Charron | 702327R | -73.5 | 45.6 | 1991-2007 |
| Mobile Upper Air Station-Quebec | 7025000 | -73.9 | 45.4 | 2014-2016 |
| Montreal/Pierre Elliott Trudeau Int’l A | 7025250 | -73.8 | 45.5 | 1986-2016 |
| Mctavish | 7024745 | -73.6 | 45.5 | 1993-2016 |
| Montreal/St-Hubert A | 7027320 | -73.4 | 45.5 | 1986-2005; 2009-2016 |
| Montreal-Est | 7025252 | -73.6 | 45.6 | 1994-2008 |
| Relative humidity (HLY01-080) | Ste-Anne-De-Bellevue 1 | 702FHL8 | -73.9 | 45.4 | 1994-2016 |
| Mobile Upper Air Station-Quebec | 7025000 | -73.9 | 45.4 | 2014-2016 |
| Montreal/Pierre Elliott Trudeau Int’l A | 7025250 | -73.8 | 45.5 | 1986-2016 |
| Mctavish | 7024745 | -73.6 | 45.5 | 1993-2016 |
| Montreal/St-Hubert A | 7027320 | -73.4 | 45.5 | 1986-2016 |
| Montreal-Est | 7025252 | -73.6 | 45.6 | 1994-2006 |
| Temperature (HLY01-078) | Ste-Anne-De-Bellevue 1 | 702FHL8 | -73.9 | 45.4 | 1993-2016 |
| Mobile Upper Air Station-Quebec | 7025000 | -73.9 | 45.4 | 2014-2016 |
| Montreal/Pierre Elliott Trudeau Int’l A | 7025250 | -73.8 | 45.5 | 1986-2016 |
| Mctavish | 7024745 | -73.6 | 45.5 | 1993-2016 |
| Montreal/St-Hubert A | 7027320 | -73.4 | 45.5 | 1986-2016 |
| Montreal-Est | 7025252 | -73.6 | 45.6 | 1994-2008 |
| Pressure (HLY01-077) | Ste-Anne-De-Bellevue 1 | 702FHL8 | -73.9 | 45.4 | 1994-2016 |
| Mobile Upper Air Station-Quebec | 7025000 | -73.9 | 45.4 | 2014-2016 |
| Montreal/Pierre Elliott Trudeau Int’l A | 7025250 | -73.8 | 45.5 | 1986-2016 |
| Mctavish | 7024745 | -73.6 | 45.5 | 1999-2016 |
| Montreal/St-Hubert A | 7027320 | -73.4 | 45.5 | 1986-2016 |
| Snow-depth (DLY04-013) | Ste-Anne-De-Bellevue 1 | 702FHL8 | -73.9 | 45.4 | 2003-2016 |
| Montreal/Pierre Elliott Trudeau Int’l A | 7025250 | -73.8 | 45.5 | 1992-2016 |
| Mctavish | 7024745 | -73.6 | 45.5 | 2015-2016 |

**Table S6**. Climate gauging stations considered to prepare merged observational climate data for Ottawa.

| **Climate variable** | **Station name** | **Climate ID** | **Longitude (ºE)** | **Latitude (ºN)** | **Time-period of data collection** |
| --- | --- | --- | --- | --- | --- |
| Global solar radiation (HLY11-061) | Ottawa CDA | 6105976 | -75.7 | 45.4 | 1986-2002 |
| Cloud-cover (HLY01-082) | Ottawa Macdonald-Cartier Int'l A | 6106000 | -75.7 | 45.3 | 1986-2016 |
| Rainfall (HLY03-123) | Ottawa Cda Rcs | 6105978 | -75.7 | 45.4 | 2002-2014 |
| Ottawa Cda | 6105976 | -75.7 | 45.4 | 1986-2001 |
| Ottawa Macdonald-Cartier Int'l A | 6106000 | -75.7 | 45.3 | 1986-2007 |
| Wind speed (HLY01-075) and wind direction (HLY01-156) | Ottawa Cda Rcs | 6105978 | -75.7 | 45.4 | 2000-2016 |
| Ottawa Macdonald-Cartier Int'l A | 6106000 | -75.7 | 45.3 | 1986-2016 |
| Relative humidity (HLY01-080) | Ottawa Cda Rcs | 6105978 | -75.7 | 45.4 | 2000-2016 |
| Ottawa Macdonald-Cartier Int'l A | 6106000 | -75.7 | 45.3 | 1986-2016 |
| Temperature (HLY01-078) | Ottawa Cda Rcs | 6105978 | -75.7 | 45.4 | 2000-2016 |
| Ottawa Macdonald-Cartier Int'l A | 6106000 | -75.7 | 45.3 | 1986-2016 |
| Pressure (HLY01-077) | Ottawa Cda Rcs | 6105978 | -75.7 | 45.4 | 2003-2016 |
| Ottawa Macdonald-Cartier Int'l A | 6106000 | -75.7 | 45.3 | 1986-2016 |
| Snow-depth (DLY04-013) | Ottawa Cda Rcs | 6105978 | -75.7 | 45.4 | 2000-2016 |
| Ottawa Macdonald-Cartier Int'l A | 6106000 | -75.7 | 45.3 | 1992-2016 |

**Table S7**. Climate gauging stations considered to prepare merged observational climate data for Saskatoon.

| **Climate variable** | **Station name** | **Climate ID** | **Longitude (ºE)** | **Latitude (ºN)** | **Time-period of data collection** |
| --- | --- | --- | --- | --- | --- |
| Global solar radiation (HLY11-061) | Outlook Pfra | 4055736 | -107.1 | 51.5 | 1988-1998 |
| Cloud-cover (HLY01-082) | Saskatoon Diefenbaker Int'l A | 4057120 | -106.7 | 52.2 | 1986-2016 |
| Rainfall (HLY03-123) | Saskatoon Diefenbaker Int'l A | 4057120 | -106.7 | 52.2 | 1986-1990 |
| Saskatoon Rcs | 4057165 | -106.7 | 52.2 | 2009-2016 |
| Saskatoon Water Tp | 4057202 | -106.7 | 52.1 | 1986-2002 |
| Saskatoon Src | 4057180 | -106.7 | 52.1 | 1986-1992 |
| Wind speed (HLY01-075) and wind direction (HLY01-156) | Saskatoon Kernen Farm | 4057154 | -106.6 | 52.2 | 1996-2006 |
| Saskatoon Diefenbaker Int'l A | 4057120 | -106.7 | 52.2 | 1986-2016 |
| Saskatoon Rcs | 4057165 | -106.7 | 52.2 | 2008-2016 |
| Relative humidity (HLY01-080) | Saskatoon Kernen Farm | 4057154 | -106.6 | 52.2 | 1996-2006 |
| Saskatoon Diefenbaker Int'l A | 4057120 | -106.7 | 52.2 | 1986-2016 |
| Saskatoon Rcs | 4057165 | -106.7 | 52.2 | 2008-2016 |
| Temperature (HLY01-078) | Saskatoon Kernen Farm | 4057154 | -106.6 | 52.2 | 1996-2006 |
| Saskatoon Diefenbaker Int'l A | 4057120 | -106.7 | 52.2 | 1986-2016 |
| Saskatoon Rcs | 4057165 | -106.7 | 52.2 | 2008-2016 |
| Pressure (HLY01-077) | Saskatoon Kernen Farm | 4057154 | -106.6 | 52.2 | 1996-2006 |
| Saskatoon Diefenbaker Int'l A | 4057120 | -106.7 | 52.2 | 1986-2016 |
| Saskatoon Rcs | 4057165 | -106.7 | 52.2 | 2008-2016 |
| Snow-depth (DLY04-013) | Saskatoon Diefenbaker Int'l A | 4057120 | -106.7 | 52.2 | 1992-1996 |
| Saskatoon Rcs | 4057165 | -106.7 | 52.2 | 2008-2016 |

**Table S8**. Climate gauging stations considered to prepare merged observational climate data for St. Johns.

| **Climate variable** | **Station name** | **Climate ID** | **Longitude (ºE)** | **Latitude (ºN)** | **Time-period of data collection** |
| --- | --- | --- | --- | --- | --- |
| Global solar radiation (HLY11-061) | St John's West Cda | 8403600 | -52.8 | 47.5 | 1986-1999 |
| Cloud-cover (HLY01-082) | St. John's Int’l A | 8403505 | -52.8 | 47.6 | 1986-2016 |
| Kelligrews | 8402478 | -53.0 | 47.5 | 1987-1989 |
| Long Pond | 840N001 | -53.0 | 47.5 | 1997-2015 |
| Rainfall (HLY03-123) | St. John's A | 8403506 | -52.8 | 47.6 | 1986-1997 |
| St John's West Cda | 8403600 | -52.8 | 47.5 | 1991-1996 |
| St Johns West Climate | 8403603 | -52.8 | 47.5 | 2010-2016 |
| Wind speed (HLY01-075) and wind direction (HLY01-156) | St. John's Int’l A | 8403505 | -52.8 | 47.6 | 1986-2016 |
| St John's West Cda Cs | 8403605 | -52.8 | 47.5 | 1999-2013 |
| St Johns West Climate | 8403603 | -52.8 | 47.5 | 2010-2018 |
| Long Pond | 840N001 | -53.0 | 47.5 | 1997-2015 |
| Kelligrews | 8402478 | -53.0 | 47.5 | 1987-1989 |
| Relative humidity (HLY01-080) | St. John's Int’l A | 8403505 | -52.8 | 47.6 | 1986-2016 |
| St John's West Cda Cs | 8403605 | -52.8 | 47.5 | 1999-2013 |
| St Johns West Climate | 8403603 | -52.8 | 47.5 | 2010-2018 |
| Long Pond | 840N001 | -53.0 | 47.5 | 1997-2015 |
| Kelligrews | 8402478 | -53.0 | 47.5 | 1987-1989 |
| Temperature (HLY01-078) | St. John's Int’l A | 8403505 | -52.8 | 47.6 | 1986-2016 |
| St John's West Cda Cs | 8403605 | -52.8 | 47.5 | 1999-2013 |
| St Johns West Climate | 8403603 | -52.8 | 47.5 | 2010-2018 |
| Long Pond | 840N001 | -53.0 | 47.5 | 1997-2015 |
| Kelligrews | 8402478 | -53.0 | 47.5 | 1987-1989 |
| Pressure (HLY01-077) | St. John's Int’l A | 8403505 | -52.8 | 47.6 | 1986-2016 |
| St John's West Cda Cs | 8403605 | -52.8 | 47.5 | 1999-2013 |
| St Johns West Climate | 8403603 | -52.8 | 47.5 | 2010-2018 |
| Long Pond | 840N001 | -53.0 | 47.5 | 1997-2015 |
| Kelligrews | 8402478 | -53.0 | 47.5 | 1987-1989 |
| Snow-depth (DLY04-013) | St. John's Int’l A | 8403505 | -52.8 | 47.6 | 1992-2016 |

**Table S9**. Climate gauging stations considered to prepare merged observational climate data for Toronto.

| **Climate variable** | **Station name** | **Climate ID** | **Longitude (ºE)** | **Latitude (ºN)** | **Time-period of data collection** |
| --- | --- | --- | --- | --- | --- |
| Global solar radiation (HLY11-061) | Toronto Met Res Stn | 6158740 | -79.6 | 43.8 | 1986-1988 |
| Toronto | 6158350 | -79.4 | 43.7 | 1986-2001 |
| Cloud-cover (HLY01-082) | Toronto Lester B. Pearson Int'l A | 6158733 | -79.6 | 43.7 | 1986-2016 |
| Toronto Buttonville A | 6158409 | -79.4 | 43.9 | 1986-2016 |
| Rainfall (HLY03-123) | Toronto Lester B. Pearson Int'l A | 6158733 | -79.6 | 43.7 | 1986-2016 |
| Toronto Met Res Stn | 6158740 | -79.6 | 43.8 | 1986-1988 |
| Toronto Old Weston Rd | 6158764 | -79.5 | 43.7 | 1986-1990 |
| Toronto North York | 615S001 | -79.5 | 43.8 | 1998-2007 |
| Toronto | 6158350 | -79.4 | 43.7 | 1953-2002 |
| Toronto City | 6158355 | -79.4 | 43.7 | 2002-2016 |
| Toronto Buttonville A | 6158409 | -79.4 | 43.9 | 1986-2007 |
| Richmond Hill 2 | 6157015 | -79.4 | 43.9 | 1989-1991 |
| Toronto Ellesmere | 6158520 | -79.3 | 43.8 | 1986-1995 |
| Toronto Nashdene | 6158748 | -79.3 | 43.8 | 1986-1995 |
| Toronto Booth | 6158406 | -79.4 | 43.7 | 1986-1993 |
| Wind speed (HLY01-075) and wind direction (HLY01-156) | Toronto Lester B. Pearson Int'l A | 6158733 | -79.6 | 43.7 | 1986-2016 |
| Pa Downsview | 6156161 | -79.6 | 43.8 | 2015-2016 |
| Toronto City | 6158355 | -79.4 | 43.7 | 2002-2015 |
| Toronto City Centre | 6158359 | -79.4 | 43.6 | 2006-2016 |
| Toronto Is A (Aut) | 6158666 | -79.4 | 43.6 | 1986-1994 |
| Toronto Buttonville A | 6158409 | -79.4 | 43.9 | 1986-2016 |
| Relative humidity (HLY01-080) | Toronto Lester B. Pearson Int'l A | 6158733 | -79.6 | 43.7 | 1986-2016 |
| Pa Downsview | 6156161 | -79.6 | 43.8 | 2015-2016 |
| Toronto City | 6158355 | -79.4 | 43.7 | 2002-2015 |
| Toronto City Centre | 6158359 | -79.4 | 43.6 | 2006-2016 |
| Toronto Buttonville A | 6158409 | -79.4 | 43.9 | 1986-2016 |
| Temperature (HLY01-078) | Toronto Lester B. Pearson Int'l A | 6158733 | -79.6 | 43.7 | 1986-2016 |
| Toronto City Centre | 6158355 | -79.4 | 43.6 | 2006-2016 |
| Toronto Is A (Aut) | 6158359 | -79.4 | 43.6 | 1986-1994 |
| Toronto City | 6158666 | -79.4 | 43.7 | 2002-2016 |
| Toronto Buttonville A | 6158409 | -79.4 | 43.9 | 1986-2016 |
| Pressure (HLY01-077) | Toronto Lester B. Pearson Int'l A | 6158733 | -79.6 | 43.7 | 1986-2016 |
| Toronto City Centre | 6158355 | -79.4 | 43.6 | 2006-2016 |
| Toronto City | 6158666 | -79.4 | 43.7 | 2002-2016 |
| Toronto Buttonville A | 6158409 | -79.4 | 43.9 | 1986-2016 |
| Pa Downsview | 6156161 | -79.6 | 43.8 | 2015-2016 |
| Snow-depth (DLY04-013) | Toronto Lester B. Pearson Int'l A | 6158733 | -79.6 | 43.7 | 1992-2016 |
| Toronto | 6158350 | -79.6 | 43.7 | 2013-2016 |
| Toronto City | 6158666 | -79.4 | 43.7 | 2002-2016 |
| Toronto Buttonville A | 6158409 | -79.4 | 43.9 | 2003-2016 |

**Table S10**. Climate gauging stations considered to prepare merged observational climate data for Vancouver.

| **Climate variable** | **Station name** | **Climate ID** | **Longitude (ºE)** | **Latitude (ºN)** | **Time-period of data collection** |
| --- | --- | --- | --- | --- | --- |
| Global solar radiation (HLY11-061) | Vancouver Ubc | 1108487 | -123.3 | 49.3 | 1986-1991 |
| Cloud-cover (HLY01-082) | Abbotsford A | 1100030 | -122.4 | 49.0 | 1986-2016 |
| Vancouver Int'l A | 1108447 | -123.2 | 49.2 | 1986-2016 |
| Vancouver Harbour Cs | 1108446 | -123.1 | 49.3 | 1986-2015 |
| Rainfall (HLY03-123) | White Rock Stp | 1108914 | -122.8 | 49.0 | 1986-2002 |
| Surrey Municipal Hall | 1107876 | -122.8 | 49.1 | 1986-2000 |
| Richmond Operations Centre | 1105210 | -123.1 | 49.2 | 2013-2015 |
| Surrey Kwantlen Park | 1107873 | -122.9 | 49.2 | 1986-1999 |
| Vancouver Sea Island Ccg | 1108380 | -123.2 | 49.2 | 2013-2015 |
| Vancouver Int'l A | 1108447 | -123.2 | 49.2 | 1986-2013 |
| Vancouver Ubc | 1108487 | -123.3 | 49.3 | 1986-1990 |
| Vancouver Harbour Cs | 1108446 | -123.1 | 49.3 | 1986-2015 |
| Burnaby Mtn Bchpa | 110JA54 | -122.9 | 49.3 | 1986-1992 |
| Port Moody Glenayre | 1106CL2 | -122.9 | 49.3 | 1986-2003 |
| Port Coquitlam City Yard | 1106256 | -122.8 | 49.3 | 1986-1990 |
| Wind speed (HLY01-075) and wind direction (HLY01-156) | Delta Burns Bog | 1102415 | -123.0 | 49.1 | 2010-2016 |
| Vancouver Sea Island Ccg | 1108380 | -123.2 | 49.2 | 2013-2016 |
| Vancouver Int'l A | 1108447 | -123.2 | 49.2 | 1986-2016 |
| Richmond Operations Centre | 1105210 | -123.1 | 49.2 | 2011-2015 |
| Vancouver Hillcrest | 1108433 | -123.1 | 49.2 | 2009-2010 |
| Vancouver Harbour Cs | 1108446 | -123.1 | 49.3 | 1986-2015 |
| West Vancouver Aut | 1108824 | -123.1 | 49.3 | 1992-2016 |
| Pitt Meadows Cs | 1106178 | -122.7 | 49.2 | 1994-2016 |
| Relative humidity (HLY01-080) | Delta Burns Bog | 1102415 | -123.0 | 49.1 | 2010-2016 |
| Vancouver Sea Island Ccg | 1108380 | -123.2 | 49.2 | 2013-2016 |
| Vancouver Int'l A | 1108447 | -123.2 | 49.2 | 1986-2016 |
| Richmond Operations Centre | 1105210 | -123.1 | 49.2 | 2011-2015 |
| Vancouver Hillcrest | 1108433 | -123.1 | 49.2 | 2009-2010 |
| Vancouver Harbour Cs | 1108446 | -123.1 | 49.3 | 1986-2015 |
| West Vancouver Aut | 1108824 | -123.1 | 49.3 | 1994-2016 |
| Pitt Meadows Cs | 1106178 | -122.7 | 49.2 | 1994-2016 |
| Point Atkinson |  | -123.3 | 49.3 | 2013-2016 |
| Temperature (HLY01-078) | Delta Burns Bog | 1102415 | -123.0 | 49.1 | 2010-2016 |
| Vancouver Sea Island Ccg | 1108380 | -123.2 | 49.2 | 2013-2016 |
| Vancouver Int'l A | 1108447 | -123.2 | 49.2 | 1986-2016 |
| Richmond Operations Centre | 1105210 | -123.1 | 49.2 | 2011-2015 |
| Vancouver Hillcrest | 1108433 | -123.1 | 49.2 | 2009-2010 |
| Vancouver Harbour Cs | 1108446 | -123.1 | 49.3 | 1986-2015 |
| West Vancouver Aut | 1108824 | -123.1 | 49.3 | 1994-2016 |
| Pitt Meadows Cs | 1106178 | -122.7 | 49.2 | 1994-2016 |
| Point Atkinson | 1106200 | -123.3 | 49.3 | 2013-2016 |
| White Rock Campbell Scientific | 1108910 | -122.8 | 49.0 | 1993-2016 |
| Pressure (HLY01-077) | Delta Burns Bog | 1102415 | -123.0 | 49.1 | 2010-2016 |
| Vancouver Sea Island Ccg | 1108380 | -123.2 | 49.2 | 2013-2016 |
| Vancouver Int'l A | 1108447 | -123.2 | 49.2 | 1986-2016 |
| Richmond Operations Centre | 1105210 | -123.1 | 49.2 | 2011-2015 |
| Vancouver Harbour Cs | 1108446 | -123.1 | 49.3 | 1986-2015 |
| West Vancouver Aut | 1108824 | -123.1 | 49.3 | 1994-2016 |
| Pitt Meadows Cs | 1106178 | -122.7 | 49.2 | 1994-2016 |
| Point Atkinson | 1106200 | -123.3 | 49.3 | 2013-2016 |
| White Rock Campbell Scientific | 1108910 | -122.8 | 49.0 | 1993-2016 |
| Snow-depth (DLY04-013) | West Vancouver Aut | 1108824 | -123.1 | 49.3 | 2005-2016 |
| Vancouver Int'l A | 1108447 | -123.2 | 49.2 | 1992-2016 |
| Richmond Operations Centre | 1105210 | -123.1 | 49.2 | 2013-2015 |
| Pitt Meadows Cs | 1106178 | -122.7 | 49.2 | 2013-2016 |
| White Rock Campbell Scientific | 1108910 | -122.8 | 49.0 | 2014-2016 |

**Table S11**. Climate gauging stations considered to prepare merged observational climate data for Winnipeg.

| **Climate variable** | **Station name** | **Climate ID** | **Longitude (ºE)** | **Latitude (ºN)** | **Time-period of data collection** |
| --- | --- | --- | --- | --- | --- |
| Global solar radiation (HLY11-061) | Winnipeg Richardson Int'l A | 5023222 | -97.2 | 49.9 | 1986-2000 |
| Cloud-cover  (HLY01-082) | Winnipeg Richardson Int'l A | 5023222 | -97.2 | 49.9 | 1986-2016 |
| Rainfall  (HLY03-123) | Winnipeg The Forks | 5023262 | -97.1 | 50.0 | 2005-2015 |
| Winnipeg A Cs | 502S001 | -97.3 | 49.9 | 2005-2016 |
| Winnipeg Richardson Int'l A | 5023222 | -97.2 | 49.9 | 1986-1990 |
| Winnipeg Hangarline Road | 5023224 | -97.2 | 49.9 | 1994-1996 |
| Wind speed (HLY01-075) and wind direction (HLY01-156) | Winnipeg The Forks | 5023262 | -97.1 | 50.0 | 1999-2016 |
| Winnipeg A Cs | 502S001 | -97.3 | 49.9 | 2013-2016 |
| Winnipeg Richardson Int'l A | 5023222 | -97.2 | 49.9 | 1986-2016 |
| Winnipeg Richardson Awos | 5023226 | -97.2 | 49.9 | 2008-2012 |
| Relative humidity  (HLY01-080) | Winnipeg The Forks | 5023262 | -97.1 | 50.0 | 1999-2016 |
| Winnipeg A Cs | 502S001 | -97.3 | 49.9 | 2013-2016 |
| Winnipeg Richardson Int'l A | 5023222 | -97.2 | 49.9 | 1986-2016 |
| Winnipeg Richardson Awos | 5023226 | -97.2 | 49.9 | 2008-2012 |
| Temperature  (HLY01-078) | Winnipeg The Forks | 5023262 | -97.1 | 50.0 | 1999-2016 |
| Winnipeg A Cs | 502S001 | -97.3 | 49.9 | 2013-2016 |
| Winnipeg Richardson Int'l A | 5023222 | -97.2 | 49.9 | 1986-2016 |
| Winnipeg Richardson Awos | 5023226 | -97.2 | 49.9 | 2008-2012 |
| Pressure  (HLY01-077) | Winnipeg The Forks | 5023262 | -97.1 | 50.0 | 2001-2016 |
| Winnipeg A Cs | 502S001 | -97.3 | 49.9 | 2013-2016 |
| Winnipeg Richardson Int'l A | 5023222 | -97.2 | 49.9 | 1986-2016 |
| Winnipeg Richardson Awos | 5023226 | -97.2 | 49.9 | 2008-2012 |
| Snow-depth (DLY04-013) | Winnipeg A Cs | 502S001 | -97.3 | 49.9 | 1997-2016 |
| Winnipeg Richardson Int'l A | 5023222 | -97.2 | 49.9 | 1992-1997 |

**Table S12**. Bias correction validation results for pressure, relative humidity, temperature, cloud-cover, wind-speed, and wind-direction.

| City | Climate variable | RMSEmodel (%) - RMSEbc (%) | MBmodel (%) | MBbc (%) | Obsavg | Modelavg | Modelbc,avg |
| --- | --- | --- | --- | --- | --- | --- | --- |
| Calgary | Pressure  (kPa) | 0.1 | 0.1 | ~0.0 | 88.9 | 88.8 | 88.9 |
| Relative humidity  (%) | 9.1 | -25.3 | 0.2 | 63.0 | 79.0 | 62.9 |
| Temperature  (ºC) | 1.4 | 10.1 | -4.0 | 4.8 | 4.4 | 5.0 |
| Cloud-cover  (%) | 4.1 | 9.2 | 3.7 | 60.9 | 55.3 | 58.6 |
| Wind speed (m/s) | 12.7 | -14.9 | 6.3 | 4.0 | 4.6 | 3.7 |
| Wind direction (º) | 2.4 | -7.9 | -1.2 | 202.7 | 218.8 | 205.1 |
| Charlottetown | Pressure  (kPa) | 0.1 | -0.3 | 0.1 | 100.8 | 101.0 | 100.7 |
| Relative humidity  (%) | 1.9 | -4.3 | 0.6 | 78.1 | 81.5 | 77.6 |
| Temperature  (ºC) | 40.0 | -70.1 | -6.8 | 6.5 | 11.0 | 6.9 |
| Cloud-cover  (%) | 4.2 | 9.4 | 6.2 | 70.3 | 63.7 | 65.9 |
| Wind speed (m/s) | 62.6 | -82.6 | -1.0 | 4.4 | 8.1 | 4.5 |
| Wind direction (º) | 1.2 | -4.3 | -2.2 | 205.0 | 213.9 | 209.6 |
| Halifax | Pressure  (kPa) | -0.1 | 0.1 | 0.5 | 100.8 | 100.7 | 100.2 |
| Relative humidity  (%) | 1.9 | -9.2 | -1.2 | 78.0 | 85.3 | 78.9 |
| Temperature  (ºC) | 7.2 | -33.7 | -6.9 | 7.6 | 10.1 | 8.1 |
| Cloud-cover  (%) | 3.7 | 6.5 | 2.3 | 67.7 | 63.4 | 66.2 |
| Wind speed (m/s) | 5.6 | -12.7 | -1.4 | 4.4 | 4.9 | 4.4 |
| Wind direction (º) | 1.0 | -1.4 | -0.7 | 213.7 | 216.7 | 215.1 |
| Moncton | Pressure  (kPa) | ~0 | 0.2 | 0.1 | 100.7 | 100.6 | 100.6 |
| Relative humidity  (%) | 1.2 | -2.7 | -0.9 | 77.0 | 79.1 | 77.7 |
| Temperature  (ºC) | 8.7 | -41.1 | -10.4 | 6.2 | 8.7 | 6.8 |
| Cloud-cover  (%) | 3.5 | 6.0 | 3.0 | 65.7 | 61.7 | 63.7 |
| Wind speed (m/s) | -1.4 | 28.3 | 4.5 | 4.8 | 3.4 | 4.6 |
| Wind direction (º) | 1.6 | -8.2 | -4.1 | 195.9 | 211.9 | 203.8 |
| Montreal | Pressure  (kPa) | 0.1 | 0.3 | -0.1 | 101.0 | 100.7 | 101.1 |
| Relative humidity  (%) | 4.5 | -15.5 | -0.7 | 70.3 | 81.2 | 70.8 |
| Temperature  (ºC) | 3.4 | -23.0 | -9.3 | 7.6 | 9.3 | 8.3 |
| Cloud-cover  (%) | 3.2 | 10.3 | 6.1 | 64.4 | 57.7 | 60.5 |
| Wind speed (m/s) | 15.9 | -25.5 | 0.7 | 3.5 | 4.4 | 3.5 |
| Wind direction (º) | 1.1 | -7.7 | -4.8 | 190.5 | 205.2 | 199.6 |
| Ottawa | Pressure  (kPa) | 0.1 | 0.3 | 0.2 | 100.3 | 100.0 | 100.1 |
| Relative humidity  (%) | 1.8 | -9.6 | 3.8 | 73.1 | 80.1 | 70.3 |
| Temperature  (ºC) | 3.9 | -28.4 | -13.3 | 7.1 | 9.1 | 8.0 |
| Cloud-cover  (%) | 2.8 | 5.3 | 2.4 | 62.1 | 58.8 | 60.6 |
| Wind speed (m/s) | 2.8 | -3.3 | 1.4 | 3.5 | 3.6 | 3.5 |
| Wind direction (º) | 1.2 | -5.9 | -2.5 | 197.6 | 209.2 | 202.6 |
| Saskatoon | Pressure  (kPa) | 0.1 | 0.5 | ~0.0 | 95.4 | 95.0 | 95.4 |
| Relative humidity  (%) | 4.3 | -11.1 | 2.7 | 73.0 | 81.2 | 71.0 |
| Temperature  (ºC) | 11.6 | -72.6 | -19.7 | 2.9 | 4.9 | 3.4 |
| Cloud-cover  (%) | 4.9 | 10.6 | 5.1 | 60.5 | 54.1 | 57.4 |
| Wind speed (m/s) | 27.2 | -38.4 | 3.0 | 4.3 | 6.0 | 4.2 |
| Wind direction (º) | 2.0 | -8.6 | -2.3 | 193.2 | 209.8 | 197.8 |
| St Johns | Pressure  (kPa) | 0.4 | -1.1 | 0.1 | 99.8 | 101.0 | 99.7 |
| Relative humidity  (%) | 1.8 | -3.8 | -0.3 | 82.6 | 85.7 | 82.4 |
| Temperature  (ºC) | 48.9 | -78.6 | -5.8 | 4.1 | 7.2 | 4.3 |
| Cloud-cover  (%) | 2.1 | -0.9 | 0.9 | 75.9 | 76.7 | 75.3 |
| Wind speed (m/s) | 39.8 | -60.1 | -3.9 | 5.2 | 8.3 | 5.4 |
| Wind direction (º) | 0.9 | -0.6 | -0.1 | 210.7 | 211.8 | 210.9 |
| Toronto | Pressure  (kPa) | -0.1 | -0.1 | 0.2 | 99.9 | 99.9 | 99.7 |
| Relative humidity  (%) | 5.3 | -14.8 | -3.9 | 70.6 | 81.1 | 73.4 |
| Temperature  (ºC) | 12.9 | -13.8 | -1.3 | 9.1 | 10.3 | 9.2 |
| Cloud-cover  (%) | 5.3 | 11.5 | 4.2 | 63.0 | 55.8 | 60.3 |
| Wind speed (m/s) | 38.2 | -50.7 | -0.3 | 4.1 | 6.2 | 4.1 |
| Wind direction (º) | 0.7 | -2.8 | -0.4 | 201.3 | 206.9 | 202.1 |
| Vancouver | Pressure  (kPa) | 1.6 | 2.5 | -0.4 | 101.2 | 98.6 | 101.6 |
| Relative humidity  (%) | 18.8 | -39.3 | 1.6 | 63.0 | 87.8 | 62.0 |
| Temperature  (ºC) | 7.7 | 22.7 | -11.0 | 10.3 | 8.0 | 11.4 |
| Cloud-cover  (%) | 3.9 | -0.9 | 0.6 | 68.4 | 69.1 | 68.0 |
| Wind speed (m/s) | 37.8 | -45.1 | -2.8 | 2.8 | 4.1 | 2.9 |
| Wind direction (º) | 3.7 | -13.4 | -1.9 | 148.5 | 168.5 | 151.3 |
| Winnipeg | Pressure  (kPa) | 0.1 | 0.2 | ~0 | 98.6 | 98.4 | 98.6 |
| Relative humidity  (%) | 4.2 | -12.5 | -1.5 | 71.6 | 80.5 | 72.7 |
| Temperature  (ºC) | 8.7 | -58.6 | -13.5 | 4.0 | 6.4 | 4.6 |
| Cloud-cover  (%) | 4.9 | 5.8 | 2.2 | 58.7 | 55.3 | 57.4 |
| Wind speed (m/s) | 37.3 | -57.6 | -10.0 | 3.8 | 6.0 | 4.2 |
| Wind direction (º) | 1.2 | -3.0 | -0.5 | 203.2 | 209.3 | 204.1 |

**Table S13**. Bias correction validation results for rainfall and snow cover.

| **City** | **Data source** | **Mean wet-day rainfall (mm)** | **Number of rainy hours** | **Number of snow hours** |
| --- | --- | --- | --- | --- |
| Calgary | Observations | 1.3 | 2531 | 33497 |
| Model | 0.2 | 27583 | 65730 |
| Bias-corrected model | 1.2 | 2826 | 26670 |
| Charlottetown | Observations | 1.1 | 4763 | 33432 |
| Model | 0.2 | 30210 | 31224 |
| Bias-corrected model | 1.4 | 4428 | 32183 |
| Halifax | Observations | 1.4 | 10742 | 27336 |
| Model | 0.3 | 73959 | 28464 |
| Bias-corrected model | 1.9 | 9834 | 27554 |
| Moncton | Observations | 1.4 | 8633 | 36932 |
| Model | 0.2 | 71274 | 38637 |
| Bias-corrected model | 1.3 | 8619 | 34472 |
| Montreal | Observations | 1.1 | 3265 | 32083 |
| Model | 0.2 | 22228 | 44068 |
| Bias-corrected model | 0.8 | 4549 | 28256 |
| Ottawa | Observations | 1.3 | 5357 | 35784 |
| Model | 0.2 | 38884 | 43488 |
| Bias-corrected model | 1.3 | 5506 | 32892 |
| Saskatoon | Observations | 1.3 | 1581 | 27576 |
| Model | 0.2 | 16919 | 36744 |
| Bias-corrected model | 0.8 | 2056 | 25133 |
| St. Johns | Observations | 1.2 | 6060 | 36744 |
| Model | 0.2 | 40948 | 41236 |
| Bias-corrected model | 1.4 | 4384 | 33126 |
| Toronto | Observations | 1.1 | 8148 | 31440 |
| Model | 0.2 | 47806 | 38376 |
| Bias-corrected model | 1.0 | 9445 | 30364 |
| Vancouver | Observations | 0.9 | 15695 | 2568 |
| Model | 0.3 | 74541 | 72576 |
| Bias-corrected model | 0.6 | 29229 | 10497 |
| Winnipeg | Observations | 1.6 | 1414 | 27456 |
| Model | 0.2 | 13297 | 31949 |
| Bias-corrected model | 1.4 | 1081 | 25706 |

**Table S14**. Bias correction validation results for global horizontal irradiance (GHI).

| City | RMSEmodel (%) - RMSEbc (%) | MBmodel (%) | MBbc (%) |
| --- | --- | --- | --- |
| Calgary | 2.0 | -3.3 | 0.2 |
| Charlottetown | 5.5 | -7.3 | -0.9 |
| Halifax | 5.5 | -6.7 | 1.3 |
| Moncton | 4.8 | -4.8 | 1.4 |
| Montreal | 6.2 | -3.8 | 2.9 |
| Ottawa | 5.0 | -2.7 | 1.7 |
| Saskatoon | 4.9 | -8.6 | -4.2 |
| St. Johns | 2.5 | 4.1 | -1.5 |
| Toronto | 12.3 | -14.9 | 0.9 |
| Vancouver | 4.3 | -14.5 | -8.8 |
| Winnipeg | 4.0 | -12.3 | -6.6 |
